# Supplementary material
Source: PubMed Central journal article supplement (PMC6791697)
Supplement: kepi-14-12-1634988-s001.pdf [file kepi-14-12-1634988-s001.pdf]

## Supplementary figures

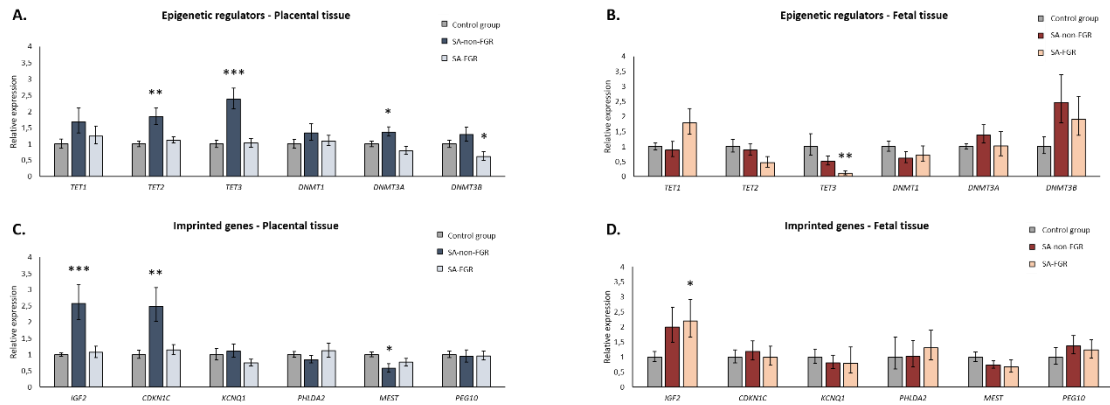

**Figure S1: Relative expression of epigenetic regulators (*TET1*, *TET2*, *TET3*, *DNMT1*, *DNMT3A* and *DNMT3B*) and imprinted genes (*IGF2*, *CDKN1C*, *KCNQ1*, *PHLDA2*, *MEST* and *PEG10*) in placental (A-C) and fetal tissues (B-D). Bars represent  $2^{\Delta\Delta Ct} \pm SEM$ ; \* represents  $p < 0.05$ , \*\* represents  $p < 0.01$ , \*\*\* represents  $p < 0.001$ .**

## Supplementary tables

**Table S1: Global 5-hmC levels in placental and fetal tissues.**

| Cases     | 5-hmC (%) in placentas | 5-hmC (%) of placental group | p value | 5-hmC (%) in fetal tissue | 5-hmC (%) of fetal tissue group | p value |
|-----------|------------------------|------------------------------|---------|---------------------------|---------------------------------|---------|
| Control 1 | 0,351608               | 0,32                         | -       | 0,208574                  | 0,27                            | -       |
| Control 2 | 0,303792               |                              |         | 0,383759                  |                                 |         |
| Control 3 | 0,326876               |                              |         | 0,154163                  |                                 |         |
| Control 4 | 0,325227               |                              |         | 0,20981                   |                                 |         |
| Control 5 | 0,333059               |                              |         | 0,119538                  |                                 |         |
| Control 6 | 0,353669               |                              |         | 0,142209                  |                                 |         |
| Control 7 | 0,387057               |                              |         | 0,729596                  |                                 |         |
| Control 8 | 0,159934               |                              |         | 0,191261                  |                                 |         |
| Case 1    | 0,201979               | 0,28                         | 0,064   | 0,056884                  | 0,17                            | 0,268   |
| Case 2    | 0,225062               |                              |         | 0,309151                  |                                 |         |
| Case 3    | 0,154988               |                              |         | 0,223001                  |                                 |         |
| Case 4    | 0,119538               |                              |         | 0,04864                   |                                 |         |
| Case 5    | 0,418796               |                              |         | 0,328936                  |                                 |         |
| Case 6    | 0,27535                |                              |         | 0,07296                   |                                 |         |
| Case 7    | 0,234542               |                              |         | 0,100989                  |                                 |         |
| Case 8    | 0,859027               |                              |         | 0,263809                  |                                 |         |
| Case 9    | 0,305853               |                              |         | 0,115416                  |                                 |         |
| Case 10   | 0,211871               |                              |         | 0,110882                  |                                 |         |
| Case 11   | 0,239901               |                              |         | 0,100989                  |                                 |         |
| Case 12   | 0,179308               |                              |         | 0,20981                   |                                 |         |
| Case 13   | 0,187139               |                              |         | 0,276587                  |                                 |         |

**Table S2: Data on maternal ages and gestational ages of SA cases.**

| Sample characteristics                                                                                                              | Controls (n=16) | Idiopathic SA (n=19) | p-value |
|-------------------------------------------------------------------------------------------------------------------------------------|-----------------|----------------------|---------|
| Maternal age at diagnosis (years)                                                                                                   | 31,94 (1,29)    | 32,11 (1,28)         | 0,927   |
| Gestational age (weeks)                                                                                                             | 18,25 (0,95)    | 18,32 (0,79)         | 0,957   |
| Data are expressed as MEAN (SD)<br>T-test was used to obtain the p-value<br>SA: Spontaneous Abortion; FGR: Fetal Growth Restriction |                 |                      |         |

**Table S3: Samples characteristics corresponding to pregnancy losses and patient clinical history.**

| Sample type | Fetal growth restriction | karyotype | Maternal age at diagnosis (years) | Gestational age (weeks) | Clinical history           |
|-------------|--------------------------|-----------|-----------------------------------|-------------------------|----------------------------|
| Control     | -                        | 46,XY     | 39                                | 19                      | 3G 1P 1A                   |
| Control     | -                        | 46,XX     | 25                                | 18                      | 6G 2P 3A                   |
| Control     | -                        | 46,XX     | 32                                | 22                      | 1G                         |
| Control     | -                        | 46,XX     | 36                                | 15                      | 2G 1A                      |
| Control     | -                        | 46,XX     | 30                                | 19                      | 2G 1P                      |
| Control     | -                        | 46,XY     | 27                                | 14                      | 2G 1P                      |
| Control     | -                        | 46,XY     | 24                                | 23                      | 1G                         |
| Control     | -                        | 46,XX     | 26                                | 14                      | 2G 1P                      |
| Control     | -                        | 46,XY     | 37                                | 21                      | 1G                         |
| Control     | -                        | 46,XY     | 38                                | 21                      | 1G                         |
| Control     | -                        | 46,XY     | 28                                | 15                      | 2G 1P                      |
| Control     | -                        | 46,XY     | 35                                | 16                      | 7G 5P 1A                   |
| Control     | -                        | 46,XY     | 31                                | 16                      | 6G 2P 2A 1FD (at 32 weeks) |
| Control     | -                        | 46,XX     | 30                                | 23                      | 2G 1A                      |
| Control     | -                        | 46,XY     | 33                                | 24                      | 1G                         |
| Control     | -                        | 46,XY     | 40                                | 12                      | 3G 2A                      |
| ISA         | Yes                      | 46,XY     | 30                                | 23                      | 1G                         |
| ISA         | Yes                      | 46,XY     | 32                                | 20                      | 2G 1P                      |
| ISA         | Yes                      | 46,XY     | 27                                | 17                      | 1G                         |
| ISA         | Yes                      | 46,XY     | 33                                | 23                      | 4G 3A                      |
| ISA         | Yes                      | 46,XY     | 29                                | 20                      | 3G 2P                      |
| ISA         | Yes                      | 46,XY     | 41                                | 18                      | 2G 1P                      |
| ISA         | Yes                      | 46,XY     | 31                                | 18                      | 1G                         |
| ISA         | Yes                      | 46,XX     | 37                                | 19                      | 2G 1P                      |
| ISA         | No                       | 46,XY     | 29                                | 12                      | No information             |
| ISA         | No                       | 46,XY     | 38                                | 19                      | 3G 2P                      |
| ISA         | No                       | 46,XY     | 31                                | 24                      | 2G 1A                      |
| ISA         | No                       | 46,XY     | 18                                | 18                      | 1G                         |
| ISA         | No                       | 46,XX     | 35                                | 14                      | 5G 4P                      |
| ISA         | No                       | 46,XX     | 24                                | 23                      | 2G 1P                      |
| ISA         | No                       | 46,XX     | 38                                | 20                      | 1G                         |
| ISA         | No                       | 46,XX     | 35                                | 15                      | 7G 6P                      |
| ISA         | No                       | 46,XX     | 38                                | 15                      | 11G 10P                    |
| ISA         | No                       | 46,XY     | 35                                | 14                      | 3G 2P                      |
| ISA         | No                       | 46,XY     | 29                                | 16                      | 1G                         |

FGR- Fetal growth restriction; G –gravida, P- Para; A- abortion, FD –Fetal death

**Table S4: Primers for qRT-PCR and amplification of bisulfite-modified DNA.**

| Gene    | Technique | Sequence                               | Product | Reference                                              |
|---------|-----------|----------------------------------------|---------|--------------------------------------------------------|
| TET1    | qRT-PCR   | Fw: 5' TGGAAAGAAGAGGGCTGCGATGA 3'      | 164     | Designed in primer-BLAST                               |
|         |           | Rv: 5' GCACGGTCTCAGTGTACTCCCTAA 3'     |         |                                                        |
| TET2    | qRT-PCR   | Fw: 5' AAGGCTGAGGGACGAGAACA 3'         | 115     | (Klug, M. <i>et al.</i> , 2013) <sup>46</sup>          |
|         |           | Rv: 5' TGAGCCATCTCTGCTTCCA 3'          |         |                                                        |
| TET3    | qRT-PCR   | Fw: 5' CCCACAAGGACCAGCATAAC 3'         | 129     | Designed in primer-BLAST                               |
|         |           | Rv: 5' CCATCTTGTACAGGGGAGA 3'          |         |                                                        |
| DNMT1   | qRT-PCR   | Fw: 5' TGGACGACCCTGACCTCAAAT 3'        | 168     | Joana Marques, C. <i>et al.</i> , (2011) <sup>47</sup> |
|         |           | Rv: 5' TGCTTACAGTACACACTGAAGCAG 3'     |         |                                                        |
| DNMT3A  | qRT-PCR   | Fw: 5' TATTGATGAGCGCACAAGAGAGC 3'      | 111     | Joana Marques, C. <i>et al.</i> , (2011) <sup>47</sup> |
|         |           | Rv: 5' TGGTACATGGCTTTTCGATAGGA 3'      |         |                                                        |
| DNMT3B  | qRT-PCR   | Fw: 5' GGCAAGTTCTCCGAGGTCTCTG 3'       | 113     | Joana Marques, C. <i>et al.</i> , (2011) <sup>47</sup> |
|         |           | Rv: 5' TGGTACATGGCTTTTCGATAGGA 3'      |         |                                                        |
| IGF2    | qRT-PCR   | Fw: 5' ATGGGGAAGTCGATGCTGGT 3'         | 154     | Designed in primer-BLAST                               |
|         |           | Rv: 5' CGGGCCTGCTGAAGTAGAA 3'          |         |                                                        |
| CDKN1C  | qRT-PCR   | Fw: 5' CGGCGATCAAGAAGCTGTCC 3'         | 186     | Designed in primer-BLAST                               |
|         |           | Rv: 5' TGGGCTCTAAATTGGCTCACC 3'        |         |                                                        |
| KCNQ1   | qRT-PCR   | Fw: 5' AGCAGAAGCAGAGGCAGAAGC 3'        | 160     | Designed in primer-BLAST                               |
|         |           | Rv: 5' CTGGGTGACAGCAGAGTGTGG 3'        |         |                                                        |
| PHLDA2  | qRT-PCR   | Fw: 5' GCGACAGCCTTCCAGCTAT 3'          | 178     | Designed in primer-BLAST                               |
|         |           | Rv: 5' TCGGTGGTGACGATGGTGAAGT 3'       |         |                                                        |
| MEST    | qRT-PCR   | Fw: 5' AGCTCTGCCTCTGTAACCTATCCC 3'     | 104     | Designed in primer-BLAST                               |
|         |           | Rv: 5' GCGGCAGCGTTTTCTGTGA 3'          |         |                                                        |
| PEG10   | qRT-PCR   | Fw: 5' CTGAGGAGAACAGCGAGAAGG 3'        | 170     | Designed in primer-BLAST                               |
|         |           | Rv: 5' CGCTATTTCACGCGAGGAC 3'          |         |                                                        |
| ACTB    | qRT-PCR   | Fw: 5' CGAGCACAGAGCCCTGCCTTT 3'        | 195     | Designed in primer-BLAST                               |
|         |           | Rv: 5' CACCATCACGCCCTGGTGCCT 3'        |         |                                                        |
| RPLP0   | qRT-PCR   | Fw: 5' CCTCGTGGAAGTGACATCGTCT 3'       | 134     | Designed in primer-BLAST                               |
|         |           | Rv: 5' CGGATAATCATCCAATAGTTGGATG 3'    |         |                                                        |
| TBP     | qRT-PCR   | Fw: 5' TGCACAGGAGCAAGAGTGAAGA 3'       | 174     | Designed in primer-BLAST                               |
|         |           | Rv: 5' TTGGTGGGTGAGCACAAGGC 3'         |         |                                                        |
| MEST    | Bisulfite | Fw: 5' TYGTTGTTGGTTAGTTTGTAYGGT 3'     | 289     | Marques, C. J. <i>et al.</i> , (2008) <sup>48</sup>    |
|         |           | Rv: 5' AAAAATAACACCCCCTCCTCAAAT 3'     |         |                                                        |
| KvDMR1  | Bisulfite | Fw: 5' TGTTTTGTAGTTTATATGGAAGGGTTAA 3' | 265     | Khoueiry, R. <i>et al.</i> , (2012) <sup>49</sup>      |
|         |           | Rv: 5' CTCACCCCTAAAACTTAAACCTC 3'      |         |                                                        |
| H19 DMR | Bisulfite | Fw: 5' AGGTGTTTTAGTTTTATGGATGATGG 3'   | 322     | Marques, C. J. <i>et al.</i> , (2008) <sup>48</sup>    |
|         |           | Rv: 5' GGTTATGTAGGTAGGATTTGAGTT 3'     |         |                                                        |
| P3 IGF2 | Bisulfite | Fw: 5' GGTATGTAGGTAGGATTTGAGTT 3'      | 364     | (Li, Y. <i>et al.</i> , (2009) <sup>50</sup>           |
|         |           | Rv: 5' CCCCACAAAAAACTACACTAC 3'        |         |                                                        |

**Table S5: Gene expression value and p-value for epigenetics regulators genes, obtained by comparing idiopathic spontaneous abortion (ISA) and control groups from placental and fetal tissues. Blue color represents the significantly altered expression. PL-Placenta; FT-Fetal tissue.**

|                         | TET1  |       | TET2  |       | TET3  |       | DNMT1 |       | DNMT3A |       | DNMT3B |       |
|-------------------------|-------|-------|-------|-------|-------|-------|-------|-------|--------|-------|--------|-------|
|                         | PL    | FT    | PL    | FT    | PL    | FT    | PL    | FT    | PL     | FT    | PL     | FT    |
| p-value                 | 0,111 | 0,581 | 0,015 | 0,140 | 0,013 | 0,008 | 0,271 | 0,062 | 0,372  | 0,239 | 0,891  | 0,127 |
| Ratio ISA               | 1,486 | 1,177 | 1,498 | 0,681 | 1,606 | 0,260 | 1,236 | 0,661 | 1,092  | 1,213 | 0,947  | 2,220 |
| Ratio control group = 1 |       |       |       |       |       |       |       |       |        |       |        |       |

**Table S6: Gene expression value and p-value for imprinted genes, obtained by comparing idiopathic spontaneous abortion (ISA) and control groups from placental and fetal tissues. Blue color represents the significantly altered expression. PL-Placenta; FT-Fetal tissue.**

|                         | IGF2  |       | CDKN1C |        | KCNQ1 |        | PHLDA2 |       | MEST  |       | PEG10 |       |
|-------------------------|-------|-------|--------|--------|-------|--------|--------|-------|-------|-------|-------|-------|
|                         | PL    | FT    | PL     | FT     | PL    | FT     | PL     | FT    | PL    | FT    | PL    | FT    |
| p-value                 | 0,017 | 0,013 | 0,014  | 0,9703 | 0,987 | 0,4654 | 0,612  | 0,711 | 0,022 | 0,128 | 0,987 | 0,341 |
| Ratio ISA               | 1,773 | 2,066 | 1,798  | 1,098  | 0,937 | 0,801  | 0,952  | 1,139 | 0,650 | 0,711 | 0,949 | 1,315 |
| Ratio control group = 1 |       |       |        |        |       |        |        |       |       |       |       |       |
